# Supplementary material for: Mussel inspired preparation of highly dispersible and biocompatible carbon nanotubes
Source: Royal Society of Chemistry journal article supplement (doi:10.1039/c4ra13408g), 2015-01-01
Supplement: c4ra13408g1.pdf [file c4ra13408g1.pdf]

## **Mussel Inspired Preparation of High Dispersible and Biocompatible Carbon Nanotubes**

Qing Wan<sup>a</sup>, Jianwen Tian<sup>a</sup>, Meiyong Liu<sup>a</sup>, Guangjian Zeng<sup>a</sup>, Zhen Li<sup>b</sup>, Ke Wang<sup>b</sup>, Qingsong Zhang<sup>b</sup>,  
Fengjie Deng<sup>a,\*</sup>, Xiaoyong Zhang<sup>a,\*</sup> and Yen Wei<sup>b,\*</sup>

<sup>a</sup> Department of Chemistry, Nanchang University, 999 Xuefu Avenue, Nanchang 330031, China. <sup>b</sup> Department of Chemistry and the Tsinghua Center for Frontier Polymer Research, Tsinghua University, Beijing, 100084, P. R. China.

Prof. Fengjie Deng, Nanchang University;

Email: [fengjiedeng@aliyun.com](mailto:fengjiedeng@aliyun.com);

Prof. Xiaoyong Zhang, Nanchang University;

Email: [xiaoyongzhang1980@gmail.com](mailto:xiaoyongzhang1980@gmail.com);

Prof. Yen Wei, Tsinghua University;

Email: [weiyen@tsinghua.edu.cn](mailto:weiyen@tsinghua.edu.cn)

**Results**

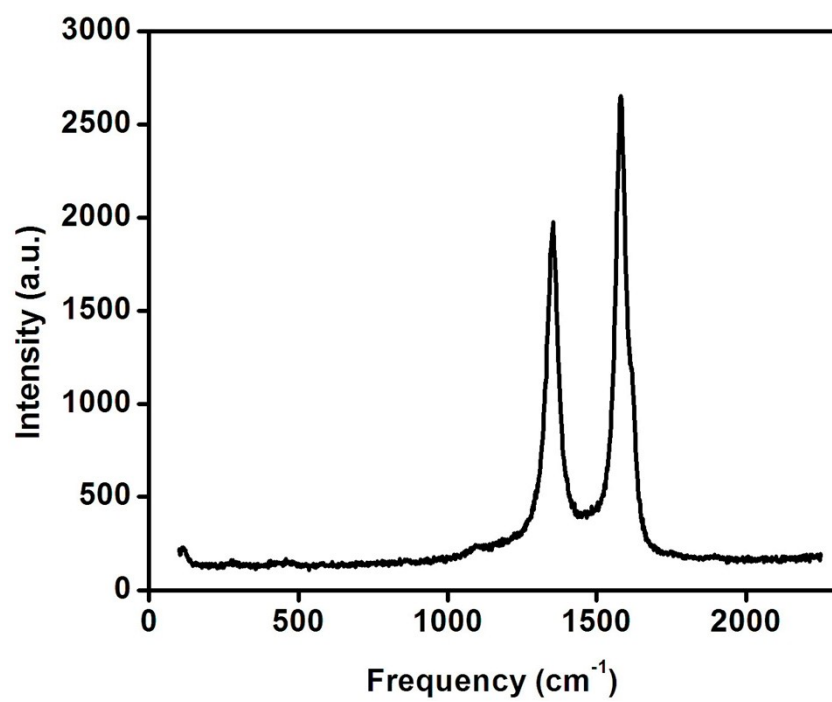

**Fig. S1** Raman spectrum of CNT-poly(PEGMA-co-IA-DA).

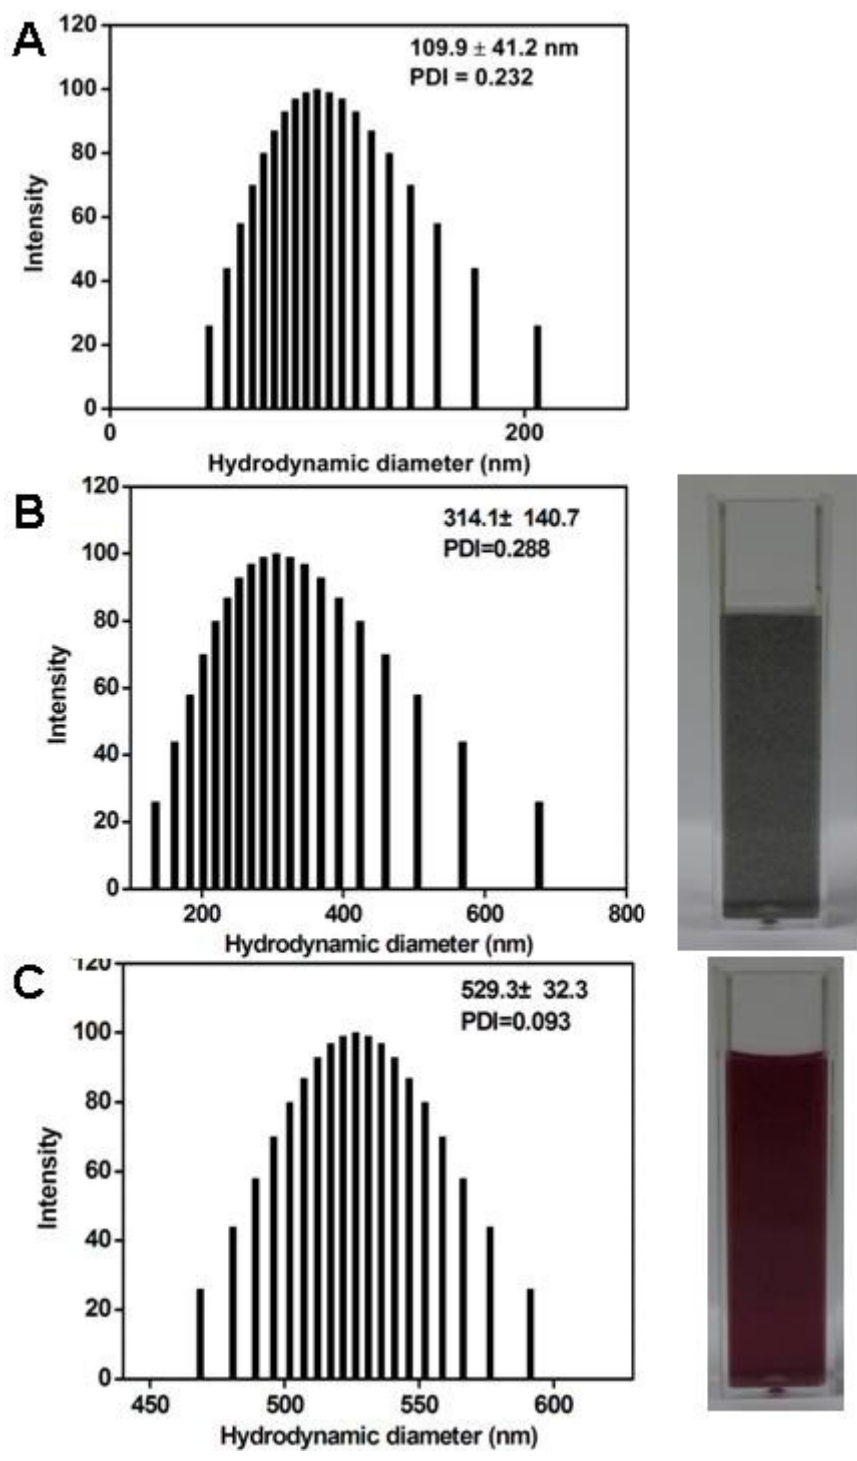

**Fig. S2** Hydrodynamic size of CNT-poly(PEGMA-co-IA-DA) in deionized water (A), PBS (B) and DMEM (C) determined by dynamic laser scattering. The upper cuvette shows the CNT-poly(PEGMA-co-IA-DA) in PBS for 2 h. And the below cuvette shows the CNT-poly(PEGMA-co-IA-DA) in DMEM for 2 h.

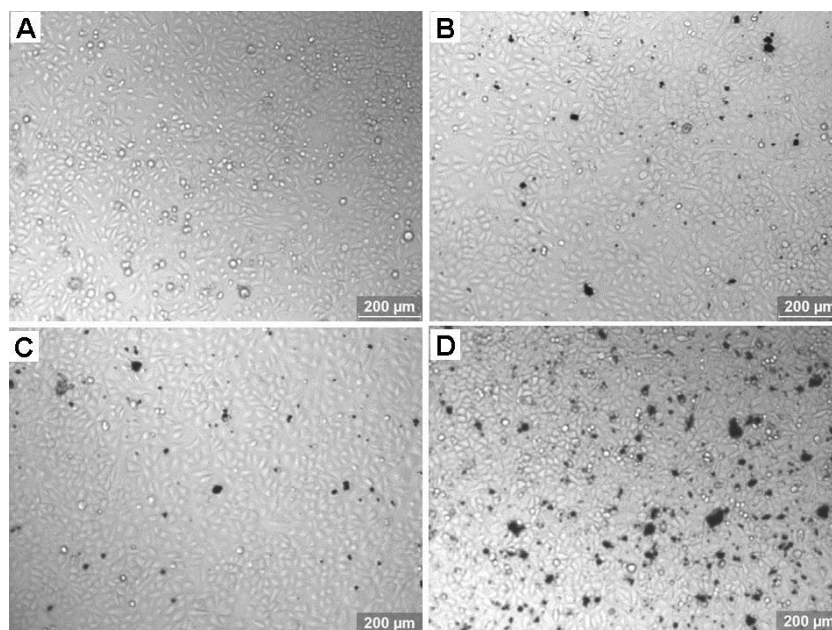

**Fig. S3** Optical microscopy observation of HepG2 cells incubated with different concentrations of CNT-poly(PEGMA-co-IA-DA). (A) Control cells, (B)  $10 \mu\text{g mL}^{-1}$ , (C)  $40 \mu\text{g mL}^{-1}$ , (D)  $80 \mu\text{g mL}^{-1}$ .

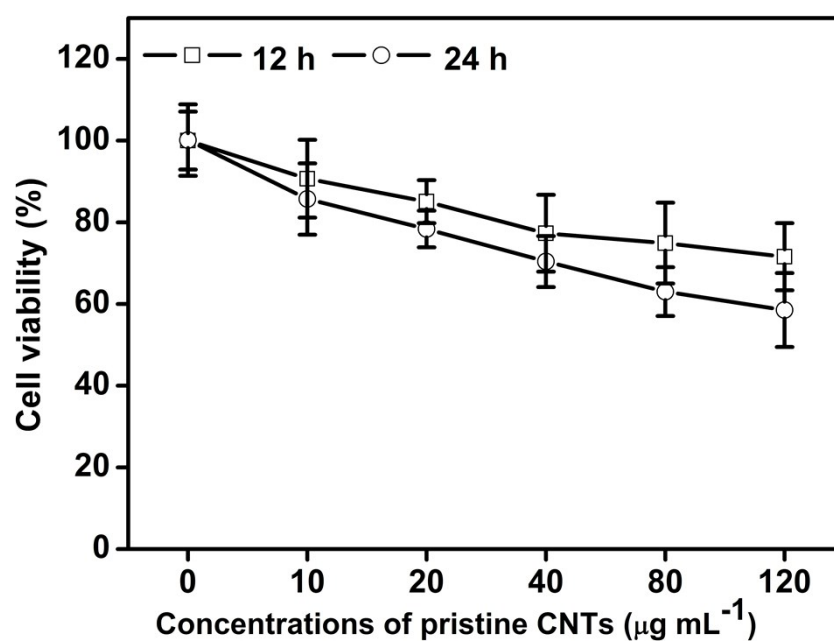

**Fig. S4** Cell viability of pristine CNTs with HepG2 cells for 12 and 24 h. The concentration of pristine CNTs was ranged from 0-120  $\mu\text{g mL}^{-1}$ .
